# Supplementary material for: A novel HIF-2α targeted inhibitor suppresses hypoxia-induced breast cancer stemness via SOD2-mtROS-PDI/GPR78-UPRER axis
Source: PubMed Central journal article supplement (PMC9433403; doi:10.1038/s41418-022-00963-8), 2022-03-17

# Original data

## Figure 1B\_MCF7

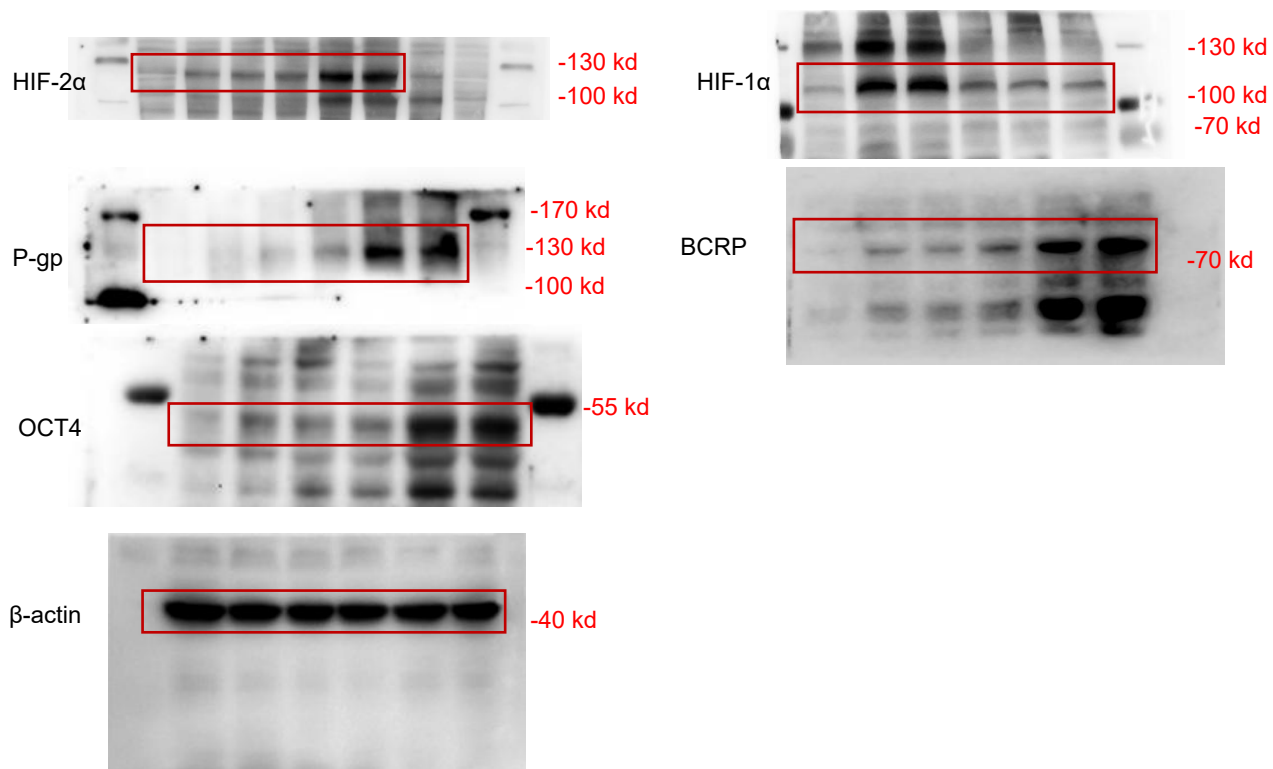

## Figure 1B\_T47D

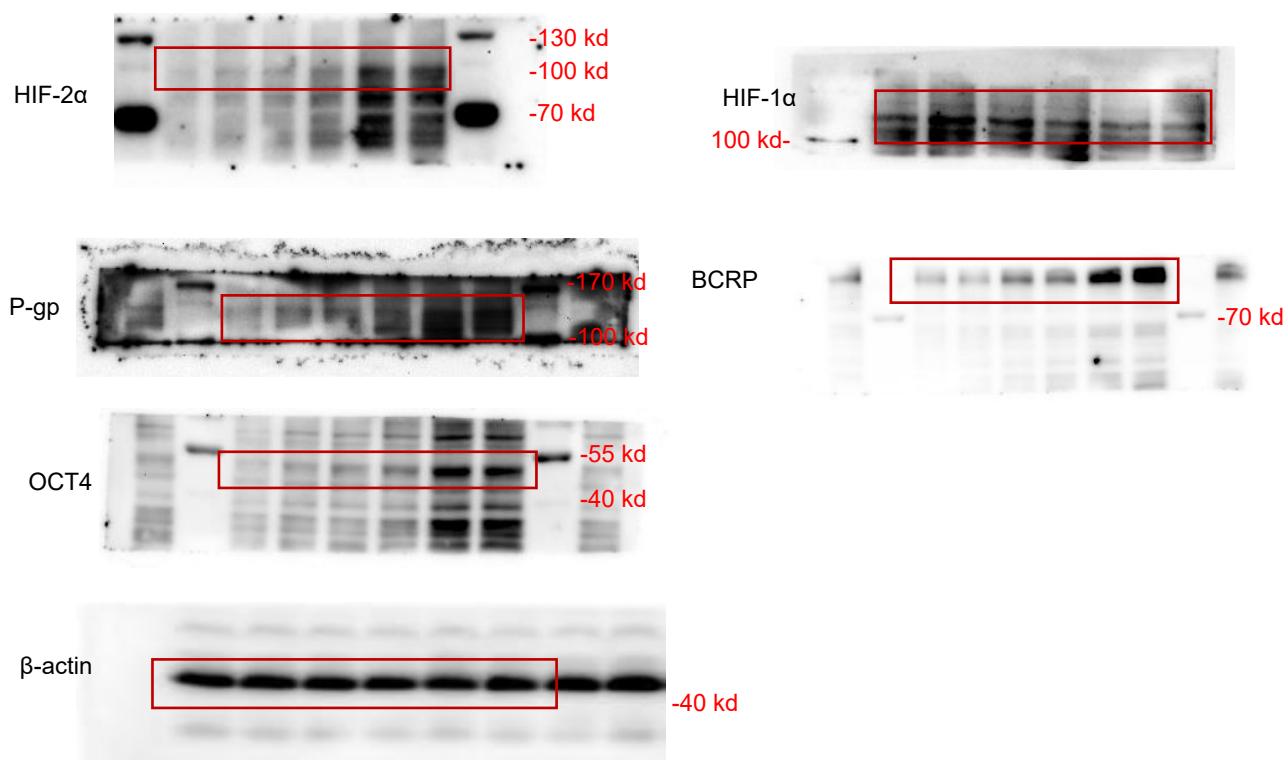

Figure 2A\_MCF7 VS MCF7 MS

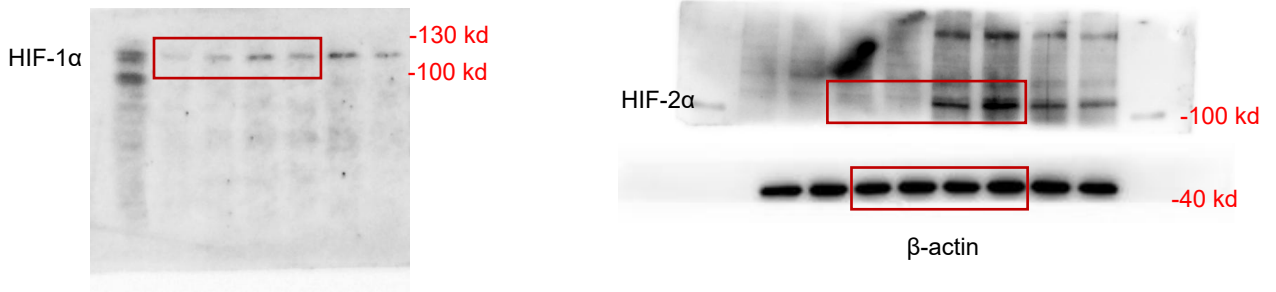

Figure 2C\_MCF7\_Ctrl vs HIF-2α

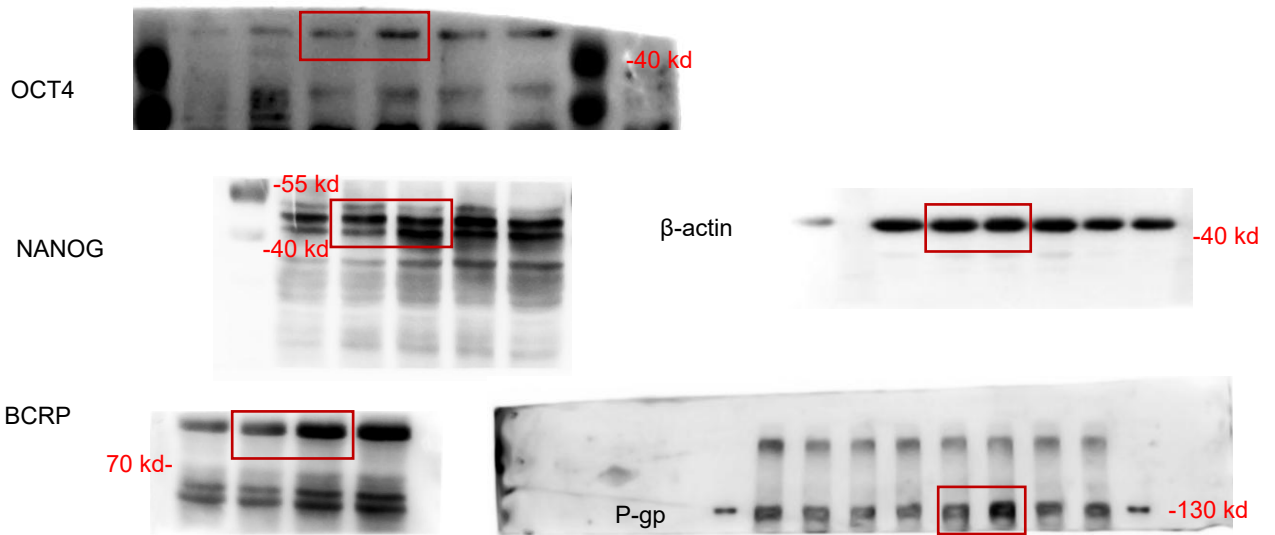

Figure 2C\_MCF7 MS\_shCtrl vs shHIF-2α

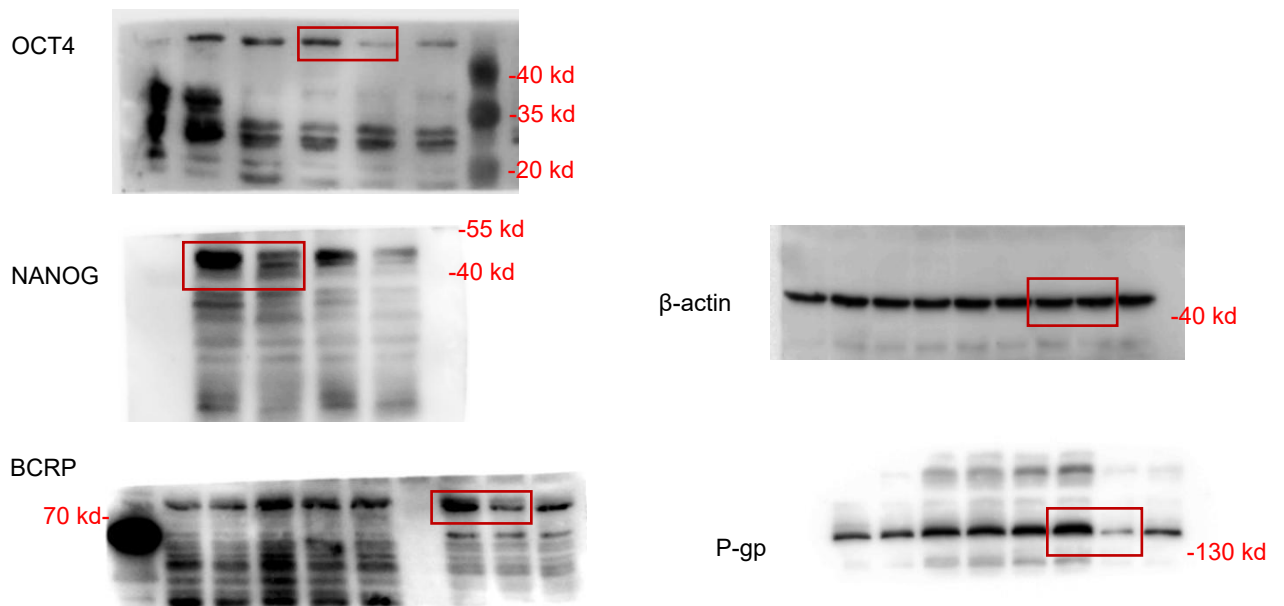

Figure 2F\_MCF7 vs MCF MS

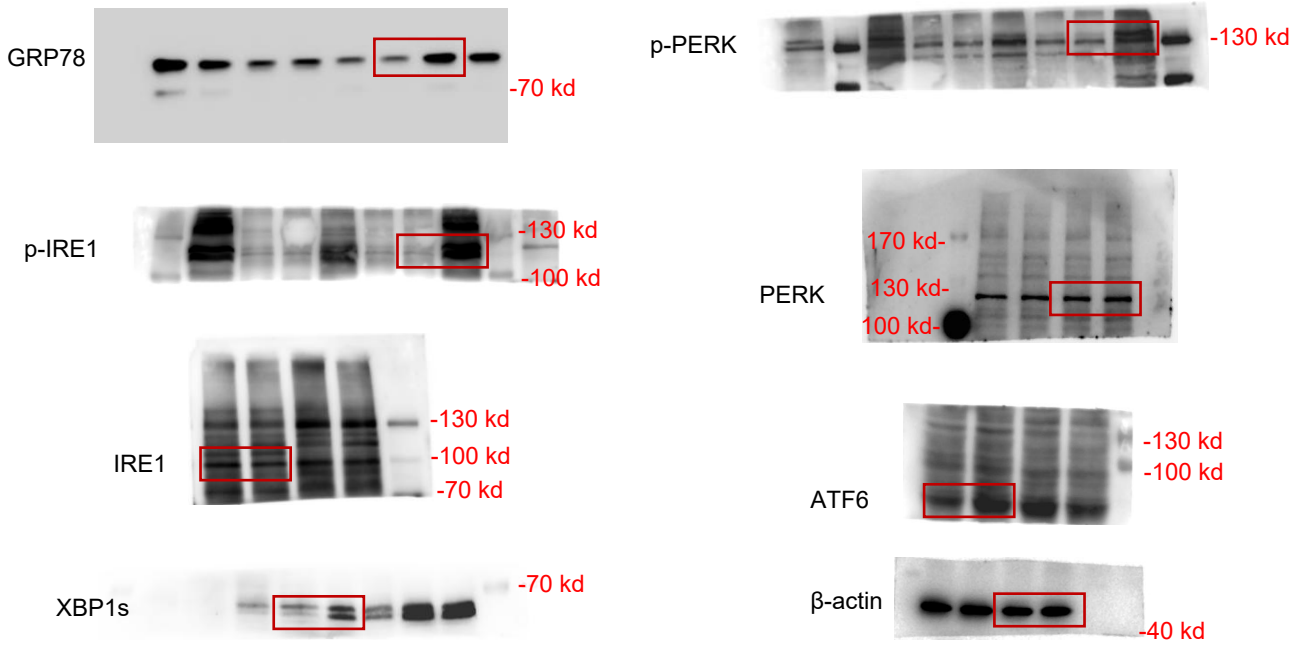

Figure 2F\_MC7\_Ctrl vs HIF-2 $\alpha$

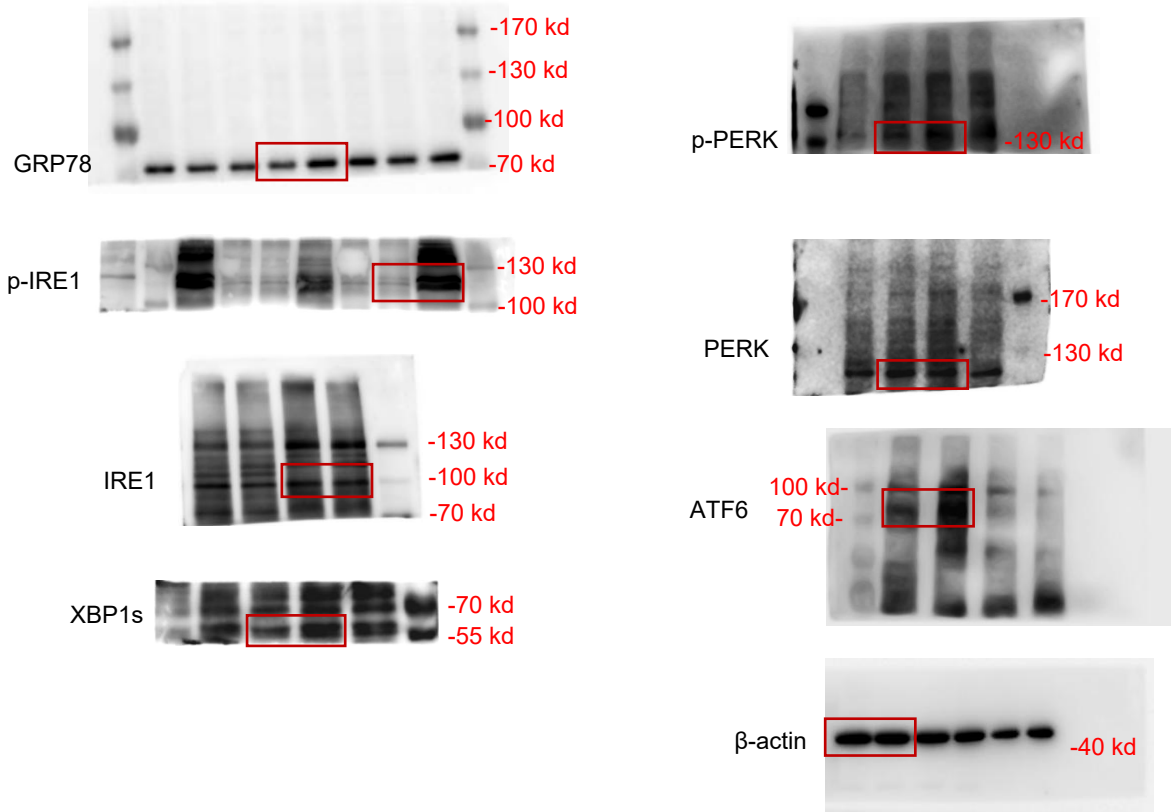

Figure 2F\_MCF7 MS\_shCtrl vs shHIF-2 $\alpha$

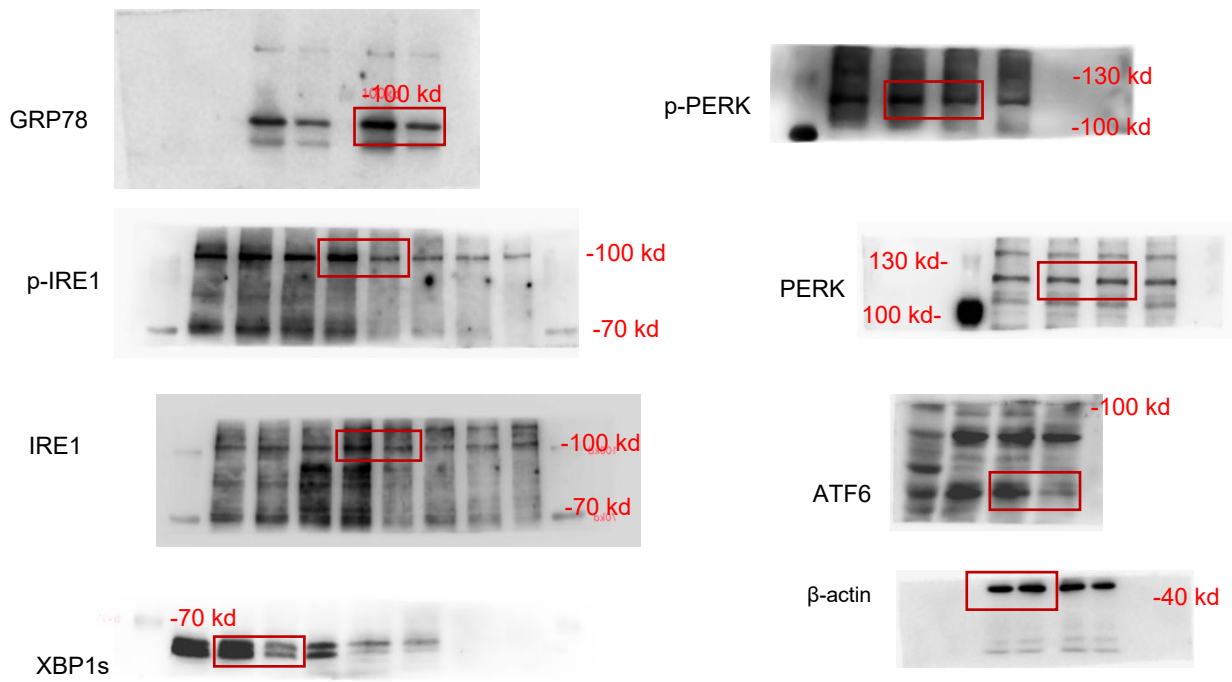

Figure 2H\_MCF7 MS\_shCtrl vs shHIF-2 $\alpha$

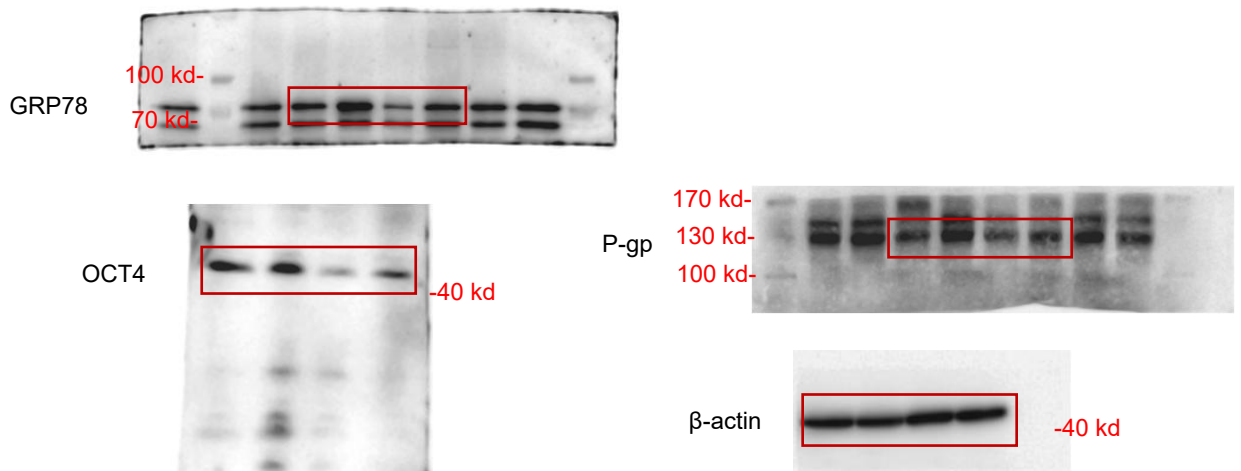

Figure 3I\_MCF7 MS\_shCtrl vs shHIF-2 $\alpha$

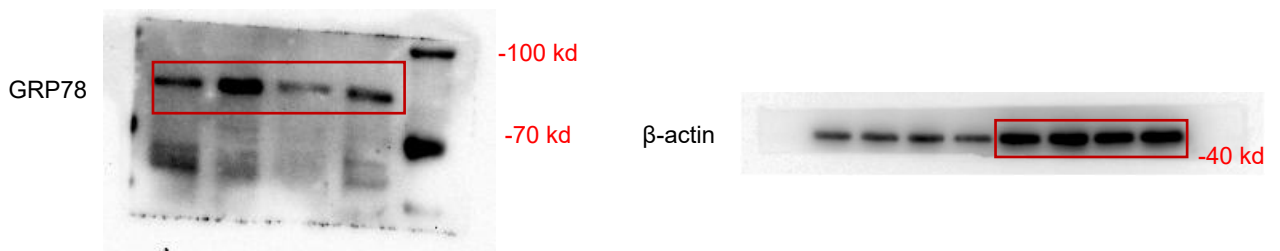

Figure 4B\_MCF 7\_Ctrl vs HIF-2 $\alpha$

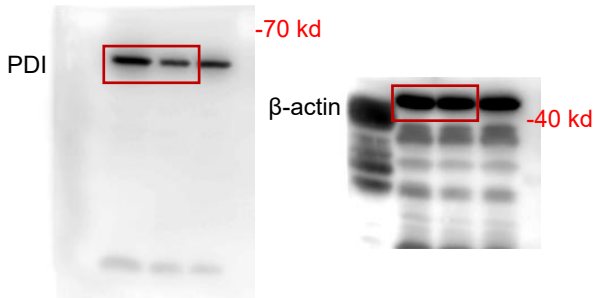

Figure 4B\_MCF7 MS\_sh-Ctrl vs sh-HIF-2 $\alpha$

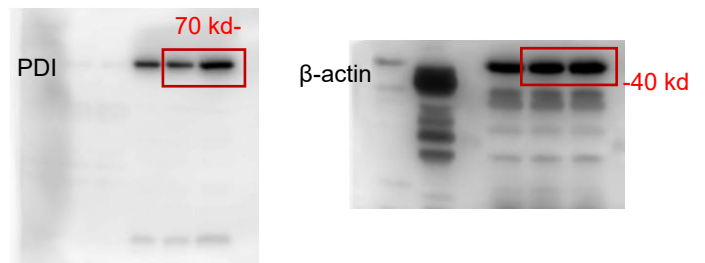

Figure 4E\_MCF7 MS\_sh-Ctrl vs sh-HIF-2 $\alpha$

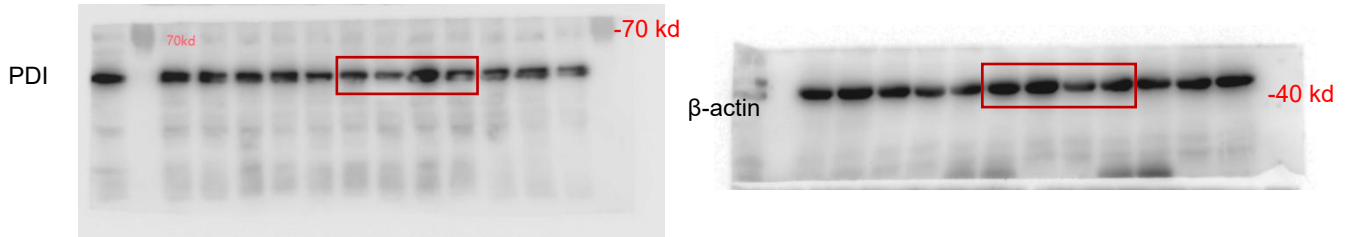

Figure 4F\_MCF7 MS

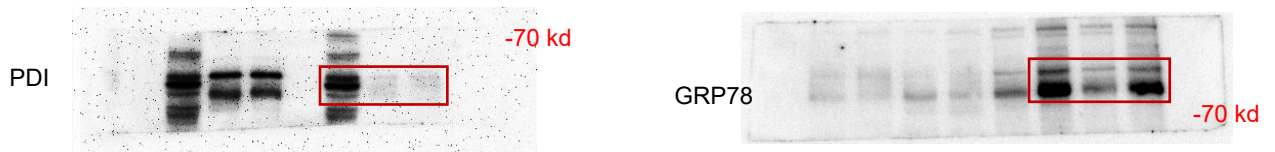

Figure 4I\_MCF7 MS

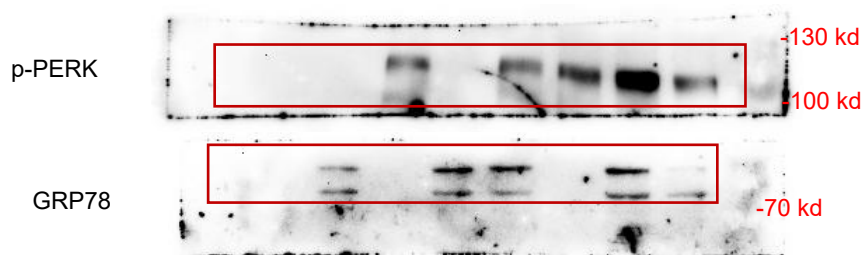

Figure 4J\_MCF7 MS\_sh-Ctrl vs sh-HIF-2 $\alpha$

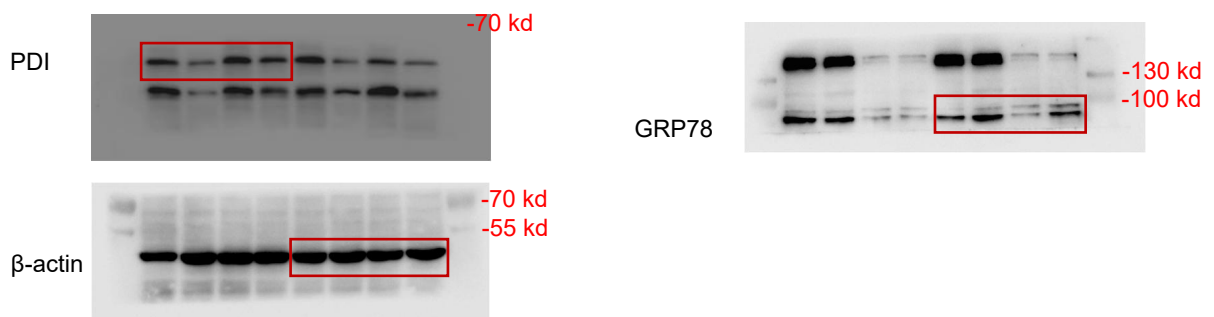

Figure 5H\_MCF7 MS\_xenograft tumors

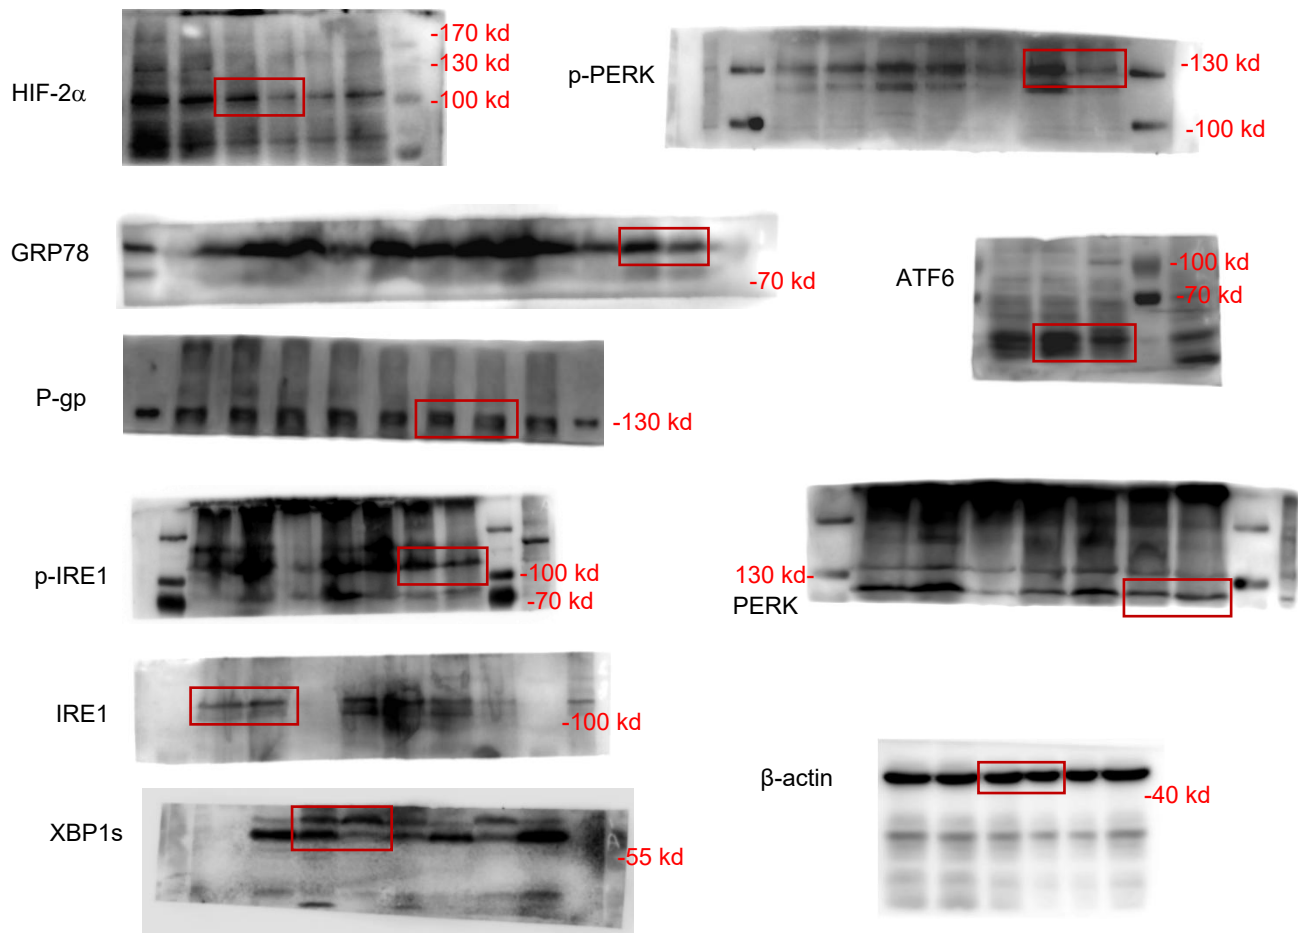

Figure 6B\_MCF7 MS

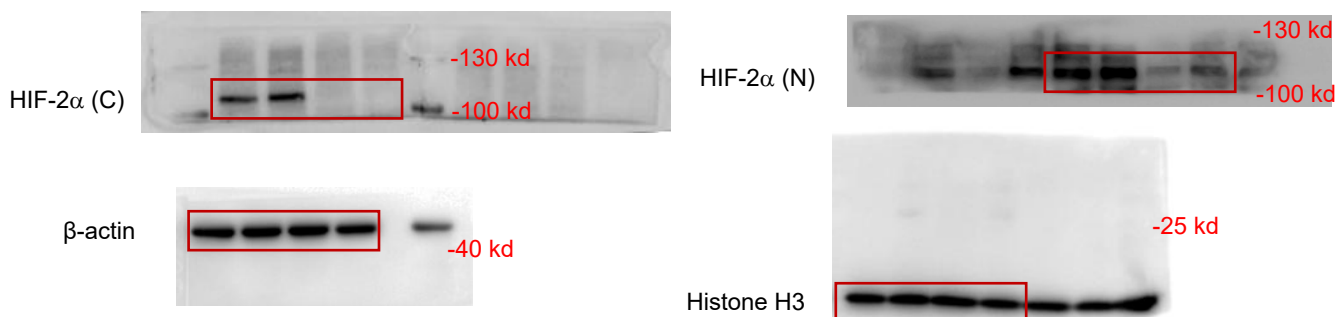

Figure 6H\_MCF7 MS

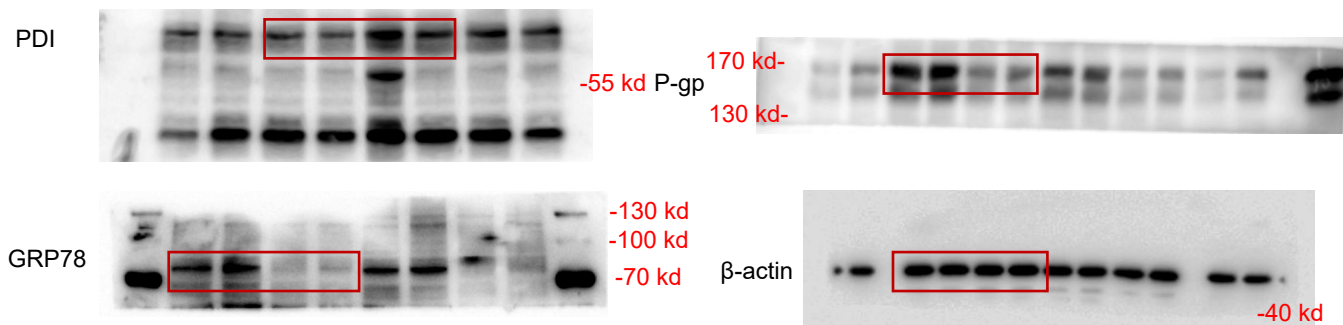



Figure 7C\_tumor primary cells<sup>CD44+CD24-</sup>

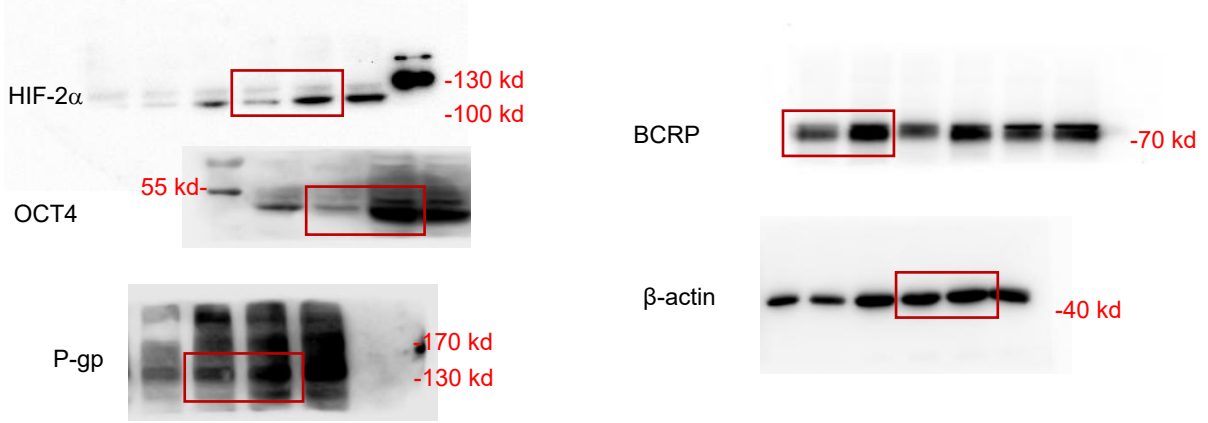

sFigure 2D\_MCF7 vs MCF7 MS

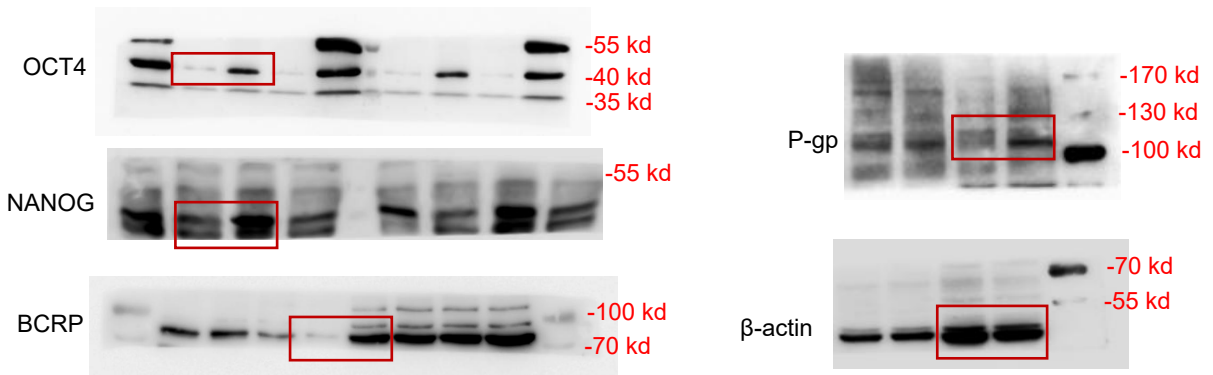

sFigure 2D\_T47D vs T47D MS

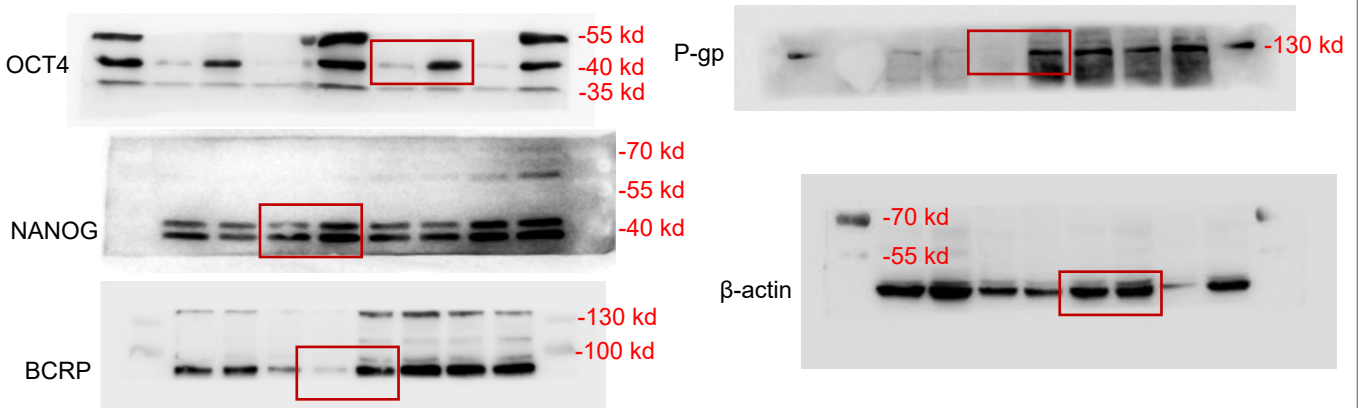

sFigure 2F\_MCF7 vs MCF7 MS

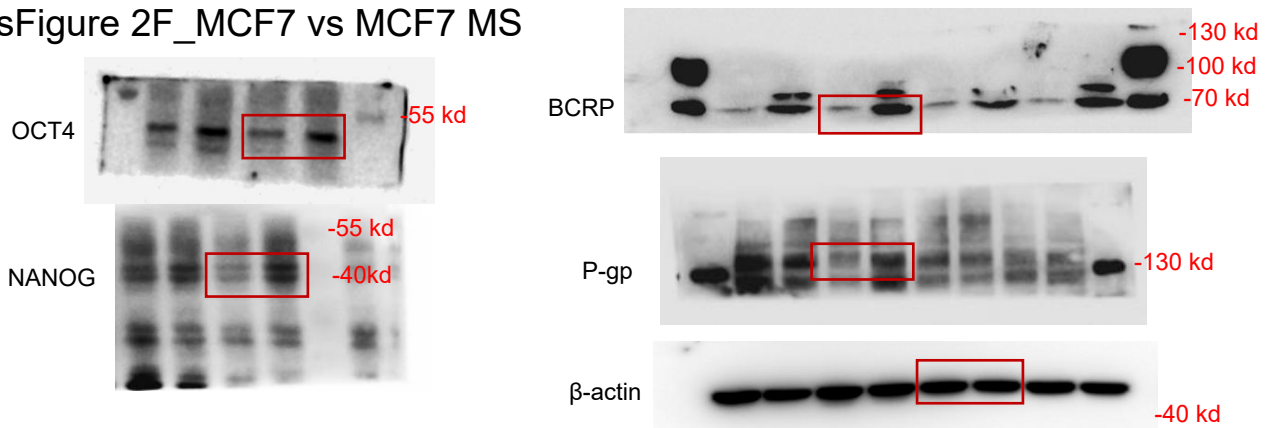

### sFigure 3A\_T47D VS T47D MS

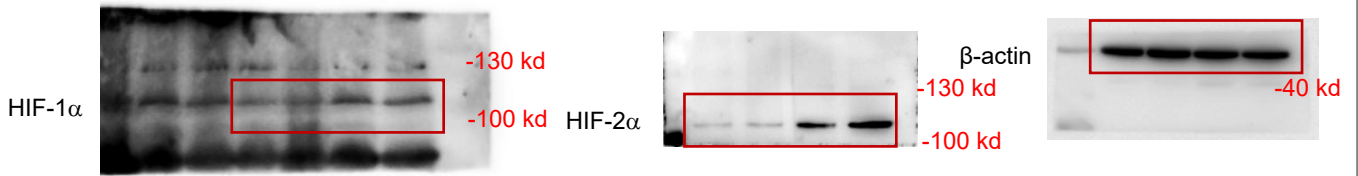

### sFigure 3D\_MCF7

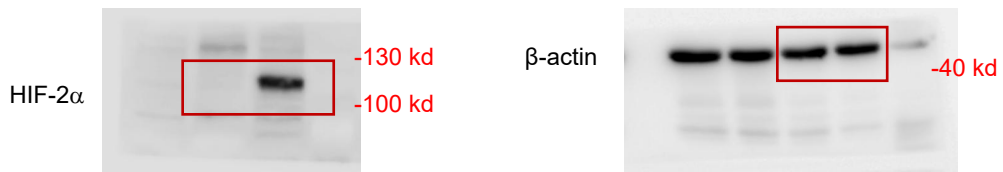

### sFigure 3D\_T47D

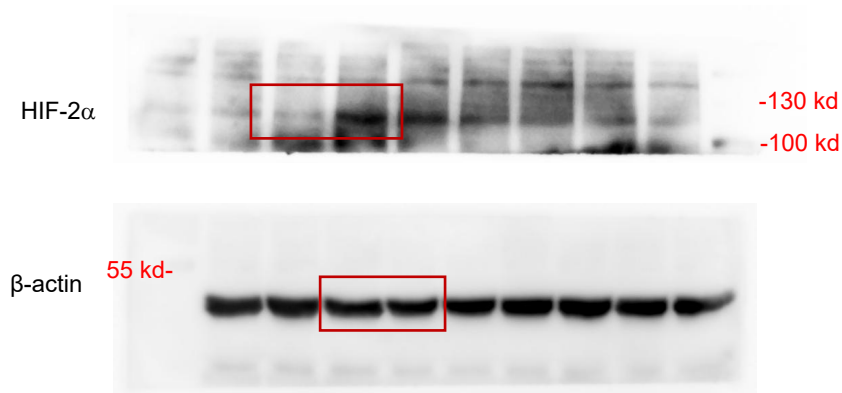

### sFigure 3G\_MCF7 MS

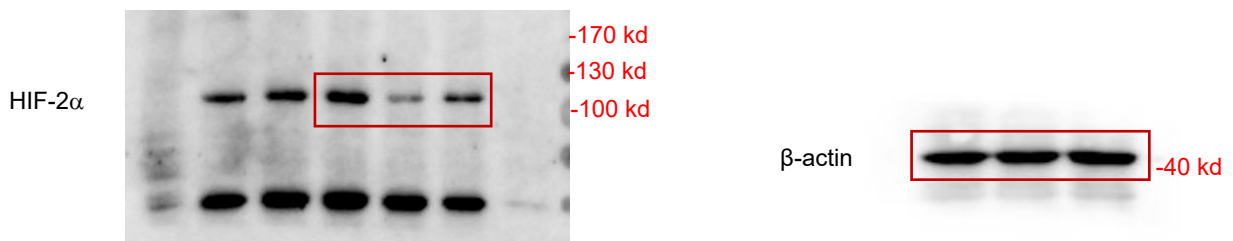

### sFigure 3G\_T47D MS

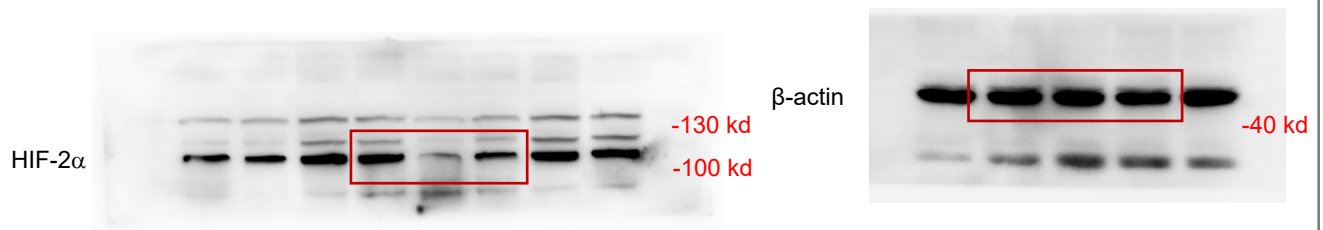



sFigure 3I\_T47D

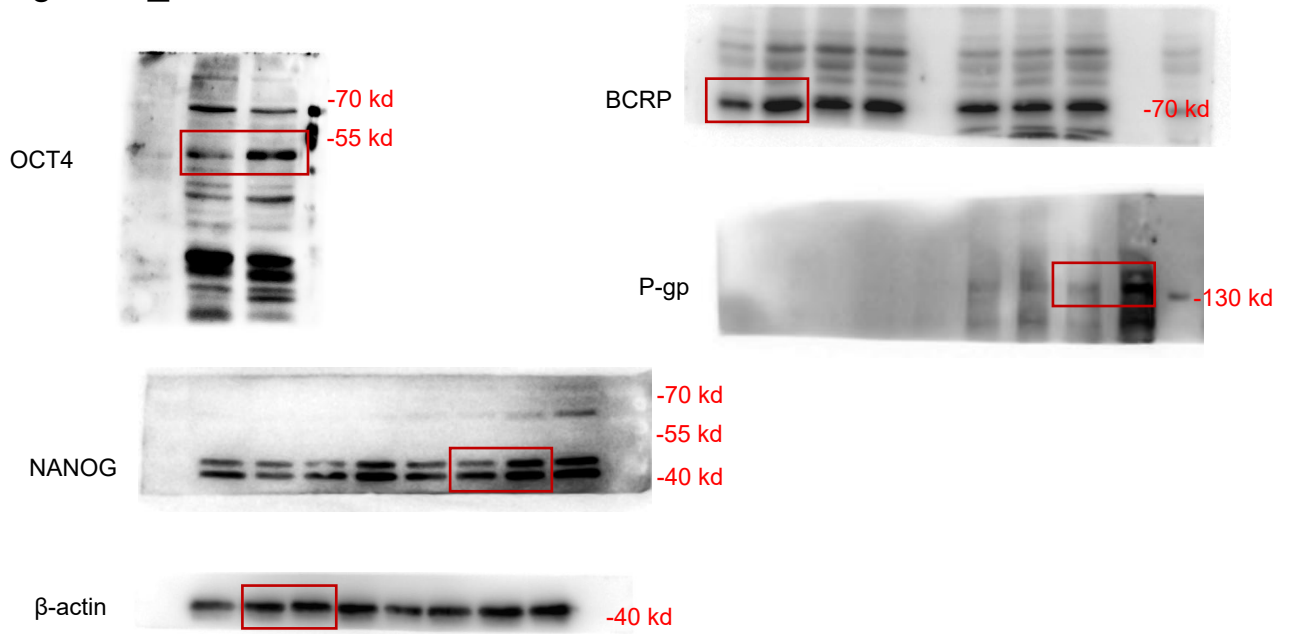

sFigure 3I\_T47D MS

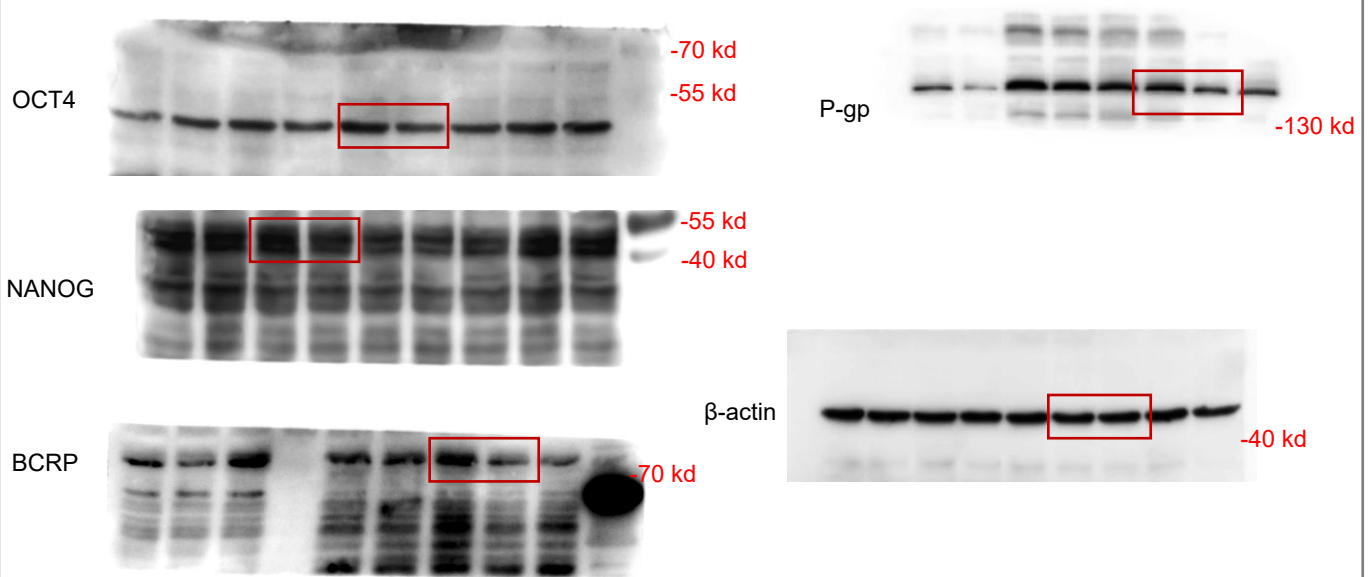

sFigure 5C\_MCF7 MS

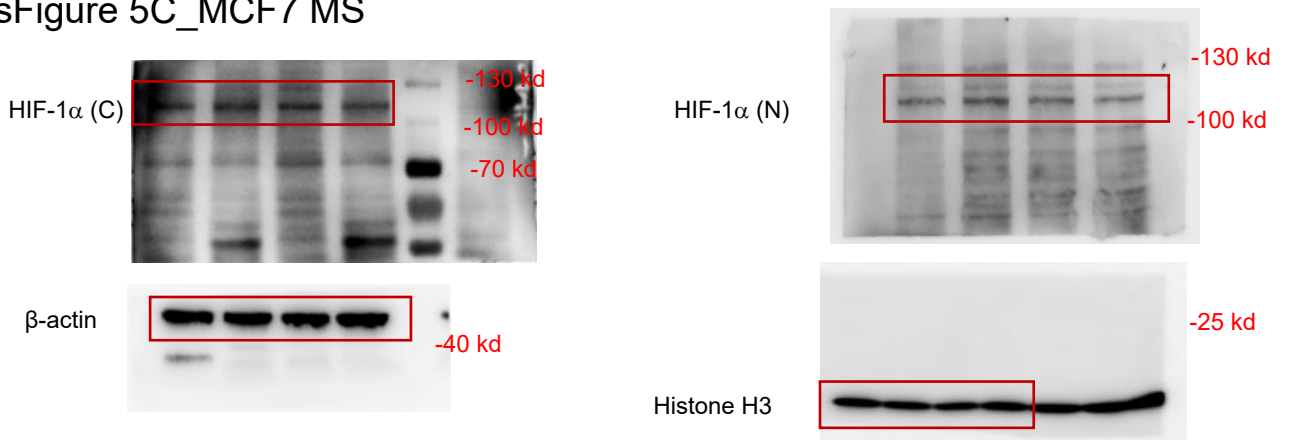

Supplement: 41418_2022_963_MOESM2_ESM.pdf [file 41418_2022_963_MOESM2_ESM.pdf]
