# Supplementary material for: A novel HIF-2α targeted inhibitor suppresses hypoxia-induced breast cancer stemness via SOD2-mtROS-PDI/GPR78-UPRER axis
Source: PubMed Central journal article supplement (PMC9433403; doi:10.1038/s41418-022-00963-8), 2022-03-17
Supplement: 41418_2022_963_MOESM3_ESM.pdf [file 41418_2022_963_MOESM3_ESM.pdf]

**Important information. Please read.**

- This form should be used by authors to request any change in authorship (adding/deleting authors) including changes in corresponding authors. This form should not be used for name changes. Please fully complete all sections. Use black ink and block capitals and provide each author's full name with the given name first followed by the family name.
- By signing this declaration, all authors guarantee that the order of the authors are in accordance with their scientific contribution, if applicable as different conventions apply per discipline, and that only authors have been added who made a meaningful contribution to the work.
- Please note, in author collaborations where there is formal agreement for representing the collaboration, it is sufficient for the representative or legal guarantor (usually the corresponding author) to complete and sign the Authorship Change Form on behalf of all authors, **next to the added/removed author(s). (Complete Section 3, followed by Section 6.)**  
In author collaborations where there is no formal agreement for representing the collaboration and **there are more than 10 authors**, one may sign for all, provided the signer appends correspondence that attests that each of the authors have agreed to the change **and the added/removed authors sign the form. (Complete Section 3, followed by Section 6.)**
- Please note, we cannot investigate or mediate any authorship disputes. If you are unable to obtain agreement from all authors (including those who you wish to be removed) you must refer the matter to your institution(s) for investigation. Please inform us if you need to do this.
- If you are not able to return a fully completed form within **30 days** of the date that it was sent to the author requesting the change, we may have to withdraw your manuscript. We cannot publish manuscripts where authorship has not been agreed by all authors (including those who have been removed).
- Incomplete forms will be rejected.
- Please return/upload this form, fully completed, to the Journals Editorial Office. The Journal and/or Publisher will consider the information you have provided to decide whether to approve the proposed change in authorship. We may decide to contact your institution for more information or undertake a further investigation, if appropriate, before making a final decision.

Section 1: Please provide the current title of manuscript

Manuscript ID no.: CDD-21-0213RRRR

Title: A novel HIF-2 $\alpha$  targeted inhibitor suppresses hypoxia-induced breast cancer stemness via SOD2-mtROS-PDI/GPR78-UPR<sup>ER</sup> axis

Section 2: Please provide the previous authorship, in the order shown on the manuscript before the changes were introduced. Please indicate the corresponding author by adding (CA) behind the name.

|                         | First name(s) | Family name | ORCID or SCOPUS id, if available |
|-------------------------|---------------|-------------|----------------------------------|
| 1 <sup>st</sup> author  | Yuanyuan      | Yan         | 0000-0001-9406-0896              |
| 2 <sup>nd</sup> author  | Miao          | He          | 0000-0001-7258-3207              |
| 3 <sup>rd</sup> author  | Lin           | Zhao        | 0000-0001-9264-6455              |
| 4 <sup>th</sup> author  | Huizhe        | Wu          | 0000-0001-7964-1342              |
| 5 <sup>th</sup> author  | Yanyun        | Zhao        | 0000-0003-1005-2683              |
| 6 <sup>th</sup> author  | Li            | Han         | 0000-0002-3654-171X              |
| 7 <sup>th</sup> author  | Binbin        | Wei         | 0000-0001-6785-4308              |
| 8 <sup>th</sup> author  | Dongman       | Ye          | 0000-0002-2901-0283              |
| 9 <sup>th</sup> author  | Xuemei        | Lv          | 0000-0002-1017-4560              |
| 10 <sup>th</sup> author | Yan           | Wang        | 0000-0002-4006-5859              |
| 11 <sup>th</sup> author | Weifan        | Yao         | 0000-0001-8878-2649              |
| 12 <sup>th</sup> author | Haishan       | Zhao        | 0000-0002-8574-7677              |
| 13 <sup>th</sup> author | Bo            | Chen        | 0000-0002-2216-2794              |
| 14 <sup>th</sup> author | Zining        | Jin         | 0000-0002-3806-4718              |
| 15 <sup>th</sup> author | Jian          | Wen         | 0000-0002-2297-4346              |
| 16 <sup>th</sup> author | Tao           | Yu          | 0000-0003-4936-8861              |
| 17 <sup>th</sup> author | Feng          | Jin         | 0000-0002-0325-5362              |
| 18 <sup>th</sup> author | Minjie        | Wei (CA)    | 0000-0002-0404-7098              |
| 19 <sup>th</sup> author |               |             |                                  |
| 20 <sup>th</sup> author |               |             |                                  |

Please use an additional sheet if there are more than 10 authors.



**Section 3: Please provide a justification for change. Please use this section to explain your reasons for changing the authorship of your manuscript, e.g. what necessitated the change in authorship? Please refer to the (journal) policy pages for more information about authorship. Please explain why omitted authors were not originally included and/or why authors were removed on the submitted manuscript.**

Yan Zhu was added as one of the authors in the manuscript submitted for the final version. During the procession of revision, Yan Zhu mainly participated in the implementation of supplementary experiments, especially the COIP experiment of Figure 4I. Therefore, we did not change the ranking of other authors, just added Yan Zhu as one of the authors of this article.

**Section 4: Proposed new authorship. Please provide your new authorship list in the order you would like it to appear on the manuscript. Please indicate the corresponding author by adding (CA) behind the name. If the Corresponding Author has changed, please indicate the reason under section 3.**

|                         | First name(s) | Family name (this name will appear in full on the final publication and will be searchable in various abstract and indexing databases) | Affiliated institute                                  | E-mail address          |
|-------------------------|---------------|----------------------------------------------------------------------------------------------------------------------------------------|-------------------------------------------------------|-------------------------|
| 1 <sup>st</sup> author  | Yuanyuan      | Yan                                                                                                                                    | Department of Pharmacology, CMU                       | yanyuanyuan1987@163.com |
| 2 <sup>nd</sup> author  | Miao          | He                                                                                                                                     | Department of Pharmacology, CMU                       | hemiao_cmu@126.com      |
| 3 <sup>rd</sup> author  | Lin           | Zhao                                                                                                                                   | Department of Pharmacology, CMU                       | zl_cmu@163.com          |
| 4 <sup>th</sup> author  | Huizhe        | Wu                                                                                                                                     | Department of Pharmacology, CMU                       | wuhz@cmu.edu.cn         |
| 5 <sup>th</sup> author  | Yanyun        | Zhao                                                                                                                                   | Department of Pharmacology, CMU                       | zhaoyanyun8@163.com     |
| 6 <sup>th</sup> author  | Li            | Han                                                                                                                                    | Department of Pharmacology, CMU                       | han_cmu@163.com         |
| 7 <sup>th</sup> author  | Binbin        | Wei                                                                                                                                    | Department of Pharmacology, CMU                       | bbwei@cmu.edu.cn        |
| 8 <sup>th</sup> author  | Dongman       | Ye                                                                                                                                     | Department of Medical Imaging, Cancer Hospital of CMU | cmu_ydm@163.com         |
| 9 <sup>th</sup> author  | Xuemei        | Lv                                                                                                                                     | Department of Pharmacology, CMU                       | xmlv@cmu.edu.cn         |
| 10 <sup>th</sup> author | Yan           | Wang                                                                                                                                   | Department of Pharmacology, CMU                       | cmuwy@126.com           |

|                         | First name(s) | Family name (this name will appear in full on the final publication and will be searchable in various abstract and indexing databases) | Affiliated institute                                                   | E-mail address              |
|-------------------------|---------------|----------------------------------------------------------------------------------------------------------------------------------------|------------------------------------------------------------------------|-----------------------------|
| 11 <sup>th</sup> author | Weifan        | Yao                                                                                                                                    | Department of Pharmacology, CMU                                        | ywf3209@163.com             |
| 12 <sup>th</sup> author | Haishan       | Zhao                                                                                                                                   | Department of Pharmacology, CMU                                        | haishan_zhao@126.com        |
| 13 <sup>th</sup> author | Bo            | Chen                                                                                                                                   | Department of Breast Surgery,<br>The First Affiliated Hospital of CMU  | bochen@cmu.edu.cn           |
| 14 <sup>th</sup> author | Zining        | Jin                                                                                                                                    | Department of Breast Surgery,<br>The First Affiliated Hospital of CMU  | m13889353565@163.com        |
| 15 <sup>th</sup> author | Jian          | Wen                                                                                                                                    | Department of Breast Surgery,<br>The Fourth Affiliated Hospital of CMU | wenjian_163@hotmail.com     |
| 16 <sup>th</sup> author | Yan           | Zhu                                                                                                                                    | Department of Pharmacology, CMU                                        | zhuyan@cmu.edu.cn           |
| 17 <sup>th</sup> author | Tao           | Yu                                                                                                                                     | Department of Medical Imaging,<br>Cancer Hospital of CMU               | yutao@cancerhosp-ln-cmu.com |
| 18 <sup>th</sup> author | Feng          | Jin                                                                                                                                    | Department of Breast Surgery,<br>The First Affiliated Hospital of CMU  | jinfeng@cmu.edu.cn          |
| 19 <sup>th</sup> author | Minjie        | Wei (CA)                                                                                                                               | Department of Pharmacology, CMU                                        | weiminjiecmu@163.com        |
| 20 <sup>th</sup> author |               |                                                                                                                                        |                                                                        |                             |

Please use an additional sheet if there are more than 10 authors.



Section 5: Author contribution, Acknowledgement and Disclosures. Please use this section to provide a new disclosure statement and, if appropriate, acknowledge any contributors who have been removed as authors and ensure you state what contribution any new authors made (if applicable per the journal or book (series) policy). **Please ensure these are updated in your manuscript - after approval of the change(s) - as our production department will not transfer the information in this form to your manuscript.**

**New acknowledgements:**

The authors would like to acknowledge the Key Laboratory of Precision Diagnosis and Treatment of Gastrointestinal Tumors, Ministry of Education (China Medical University, Shenyang, China) for providing the space and equipment for conducting the experiments.

**New Disclosures (financial and non-financial interests, funding):**

This work was supported by the National Natural Science Foundation of China (NSFC, No. 81373427, 81902708, 81972794, 81702616), NSFC-Liaoning joint fund key program (No. U20A20413), Key R&D Guidance Plan Projects in Liaoning Province (2019JH8/10300011), and Shenyang S&T Projects (19-109-4-09, 20-204-4-22), Program for Shenyang High Level Talent Innovation and Entrepreneurship Team (2019-SYRCCY-B-01), Major Special S&T Projects in Liaoning Province (2019JH1/10300005), Liaoning provincial department of education scientific research project (QN2019034), Science and Technology Program of Liaoning Province (2017225036).

**New Author Contributions statement (if applicable per the journal policy):**

YYY, MJW, FJ, TY and MH conceived the study design. YYY, YYZ, LH, BBW, DMY, XML, YW, WFY, HSZ, BC, ZNJ, JW, and YZ performed experiments and collected all data. YYY, MJW, TY, FJ, MH, LZ, HZW, and collected and analyzed data and drafted the manuscript. All authors read and approved the final manuscript.

State 'Not applicable' if there are no new authors.



**Section 6: Declaration of agreement. All authors, unchanged, new and removed *must* sign this declaration.**

(NB: Please print the form, (docu)-sign and return/upload a scanned copy. Please note that signatures that have been inserted as an image file are acceptable as long as it is handwritten. Typed names in the signature box are unacceptable.) \* Please delete as appropriate. Delete all of the bold if you were on the original authorship list and are remaining as an author.

|                         | First name | Family name |                                                                                                           | Signature    | Date      |
|-------------------------|------------|-------------|-----------------------------------------------------------------------------------------------------------|--------------|-----------|
| 1 <sup>st</sup> author  | Yuanyuan   | Yan         | I agree to the proposed new authorship shown in section 4 and the proposed change in corresponding author | Yuanyuan Yan | 2/11/2022 |
| 2 <sup>nd</sup> author  | Miao       | He          | I agree to the proposed new authorship shown in section 4 and the proposed change in corresponding author | Miao He      | 2/11/2022 |
| 3 <sup>rd</sup> author  | Lin        | Zhao        | I agree to the proposed new authorship shown in section 4 and the proposed change in corresponding author | Lin Zhao     | 2/11/2022 |
| 4 <sup>th</sup> authors | Huizhe     | Wu          | I agree to the proposed new authorship shown in section 4 and the proposed change in corresponding author | Huizhe Wu    | 2/11/2022 |
| 5 <sup>th</sup> author  | Yanyun     | Zhao        | I agree to the proposed new authorship shown in section 4 and the proposed change in corresponding author | Yanyun Zhao  | 2/11/2022 |
| 6 <sup>th</sup> author  | Li         | Han         | I agree to the proposed new authorship shown in section 4 and the proposed change in corresponding author | Li Han       | 2/12/2022 |
| 7 <sup>th</sup> author  | Binbin     | Wei         | I agree to the proposed new authorship shown in section 4 and the proposed change in corresponding author | Binbin Wei   | 2/11/2022 |

|                         | First name | Family name |                                                                                                                                   | Signature    | Date      |
|-------------------------|------------|-------------|-----------------------------------------------------------------------------------------------------------------------------------|--------------|-----------|
| 8 <sup>th</sup> author  | Dongman    | Ye          | I agree to the proposed new authorship shown in section 4 and the proposed change in corresponding author                         | Dongman Ye   | 2/12/2022 |
| 9 <sup>th</sup> author  | Xuemei     | Lv          | I agree to the proposed new authorship shown in section 4 and the proposed change in corresponding author                         | Xuemei Lv    | 2/12/2022 |
| 10 <sup>th</sup> author | Yan        | Wang        | I agree to the proposed new authorship shown in section 4 and the proposed change in corresponding author                         | Yan Wang     | 2/11/2022 |
| 11 <sup>th</sup> author | Weifan     | Yao         | I agree to the proposed new authorship shown in section 4 and the proposed change in corresponding author                         | Weifan Yao   | 2/12/2022 |
| 12 <sup>th</sup> author | Haishan    | Zhao        | I agree to the proposed new authorship shown in section 4 and the proposed change in corresponding author                         | Haishan Zhao | 2/11/2022 |
| 13 <sup>th</sup> author | Bo         | Chen        | I agree to the proposed new authorship shown in section 4 and the proposed change in corresponding author                         | Bo Chen      | 2/11/2022 |
| 14 <sup>th</sup> author | Zining     | Jin         | I agree to the proposed new authorship shown in section 4 and the proposed change in corresponding author                         | Zining Jin   | 2/12/2022 |
| 15 <sup>th</sup> author | Jian       | Wen         | I agree to the proposed new authorship shown in section 4 and the proposed change in corresponding author                         | Jian Wen     | 2/12/2022 |
| 16 <sup>th</sup> author | Yan        | Zhu         | I agree to the proposed new authorship shown in section 4 <b>and the addition</b> and the proposed change in corresponding author | Yan Zhu      | 2/12/2022 |



|                         | First name | Family name |                                                                                                           | Signature         | Date      |
|-------------------------|------------|-------------|-----------------------------------------------------------------------------------------------------------|-------------------|-----------|
| 17 <sup>th</sup> author | Tao        | Yu          | I agree to the proposed new authorship shown in section 4 and the proposed change in corresponding author | <i>Tao Yu</i>     | 2/12/2022 |
| 18 <sup>th</sup> author | Feng       | Jin         | I agree to the proposed new authorship shown in section 4 and the proposed change in corresponding author | <i>Feng Jin</i>   | 2/11/2022 |
| 19 <sup>th</sup> author | Minjie     | Wei (CA)    | I agree to the proposed new authorship shown in section 4 and the proposed change in corresponding author | <i>Minjie Wei</i> | 2/11/2022 |
| 20 <sup>th</sup> author |            |             |                                                                                                           |                   |           |

**In case of author collaborations with formal agreement:**

|                                | Name of consortium/consortia | First name | Family name |                                                                                                                                                                               | Signature | Date |
|--------------------------------|------------------------------|------------|-------------|-------------------------------------------------------------------------------------------------------------------------------------------------------------------------------|-----------|------|
| Representative/legal guarantor |                              |            |             | I agree to the proposed new authorship shown in section 4 /and the <b>addition/removal*of my name to the authorship list</b> /and the proposed change in corresponding author |           |      |

Both added/removed authors should complete the information in the first table under Section 6.

---- End of form ----
